# Supplementary material for: Effects of Arts-Based Pedagogy on Competence Development in Nursing: A Critical Systematic Review
Source: MDPI journal article supplement (doi:10.3390/nursrep14020083), 2024-04-27
Supplement: s1 [file s1]

**Table S1.** Database search.

| Last Run Via                                                                                                                          | Query                                                                                                                                                                                                                                                                                                                                                 | Limiters/Expanders                                                                                                                                                                                                                                                       | Results |
|---------------------------------------------------------------------------------------------------------------------------------------|-------------------------------------------------------------------------------------------------------------------------------------------------------------------------------------------------------------------------------------------------------------------------------------------------------------------------------------------------------|--------------------------------------------------------------------------------------------------------------------------------------------------------------------------------------------------------------------------------------------------------------------------|---------|
| Interface<br>- EBSCOhost Research Databases Search Screen<br>- Advanced Search Database<br>- CINAHL<br>Date<br>- 17.01.2024           | TI ( nursing education OR nursing students ) ANDTI ( art OR arts OR painting OR sculpture OR drawing OR music OR dance OR drama OR poetry OR photo* OR movie* ) OR AB ( nursing education OR nursing students ) AND AB ( art OR arts OR painting OR sculpture OR drawing OR music OR dance OR drama OR poetry OR photo* OR movie*)                    | Limiters<br>- Abstract Available; Publication Date:19990101-20231231; English Language; Peer Reviewed; Research Article<br>Expanders<br>- Apply equivalent subjects<br>Search modes<br>- Boolean/Phrase                                                                  | 409     |
| Interface<br>- EBSCOhost Research Databases Search Screen<br>- Advanced Search Database<br>- ERIC<br>Date<br>- 17.01.2024             | TI ( nursing education OR nursing students ) ANDTI ( art OR arts OR painting OR sculpture OR drawing OR music OR dance OR drama OR poetry OR photo* OR movie* ) OR AB ( nursing education OR nursing students ) AND AB ( art OR arts OR painting OR sculpture OR drawing OR music OR dance OR drama OR poetry OR photo* OR movie*)                    | Limiters<br>- Academic (Peer-Reviewed) Journals; Published Date: 19990101-20231231; Journal or Document: Journal Article (EJ); Language: English<br>Expanders<br>- Apply equivalent subjects<br>Search modes<br>- Boolean/Phrase                                         | 52      |
| Interface<br>- EBSCOhost Research Databases Search Screen<br>- Advanced Search Database<br>- MEDLINE<br>Date<br>- 17.01.2024          | TI ( nursing education OR nursing students ) ANDTI ( art OR arts OR painting OR sculpture OR drawing OR music OR dance OR drama OR poetry OR photo* OR movie*)                                                                                                                                                                                        | Limiters<br>- Peer Reviewed; Publication Date:19990101-20231231; Abstract Available; English Language; Publication Type: Journal Article<br>Expanders<br>- Apply equivalent subjects<br>Search modes<br>- Boolean/Phrase                                                 | 632     |
| Interface<br>- EBSCOhost Research Databases Search Screen<br>- Advanced Search Database<br>- APA PsycInfo<br>Date<br>- 17.01.2024     | TI ( nursing education OR nursing students ) ANDTI ( art OR arts OR painting OR sculpture OR drawing OR music OR dance OR drama OR poetry OR photo* OR movie* ) OR AB ( nursing education OR nursing students ) AND AB ( art OR arts OR painting OR sculpture OR drawing OR music OR dance OR drama OR poetry OR photo* OR movie*)                    | Limiters<br>- Publication Year: 1999-2023; Publication Date: 19990101-20231231; Peer Reviewed; Publication Type: Peer Reviewed Journal; English language; Document Type: Journal Article<br>Expanders<br>- Apply equivalent subjects<br>Search modes<br>- Boolean/Phrase | 179     |
| Interface<br>- Hellenic Academic Libraries Link Search Screen<br>- Advanced Search Database<br>- Scopus<br>Date<br>- 18.01.2024       | ( TITLE-ABS-KEY ( nurs* education ) AND TITLE-ABS-KEY ( art ) OR TITLE-ABS-KEY ( arts ) OR TITLE-ABS-KEY ( painting ) OR TITLE-ABS-KEY ( sculpture ) OR TITLE-ABS-KEY ( drawing ) OR TITLE-ABS-KEY ( music ) OR TITLE-ABS-KEY ( drama ) OR TITLE-ABS-KEY ( poetry ) OR TITLE-ABS-KEY ( dance ) OR TITLE-ABSKEY ( photo* ) OR TITLE-ABS-KEY ( movie )) | PUBYEAR > 1998 AND PUBYEAR < 2024 AND ( LIMIT-TO ( SRCTYPE , "j" ) ) AND ( LIMIT-TO ( DOCTYPE , "ar" ) ) AND ( LIMITTO ( LANGUAGE , "English" ) )                                                                                                                        | 1,083   |
| Interface<br>- Web of Science Search Screen<br>- Advanced Search Database<br>- Web of Science Core Collection<br>Date<br>- 18.01.2024 | nursing education OR nursing students (Title) AND art OR arts OR painting OR sculpture OR drawing OR music OR dance OR drama OR poetry OR photo* OR movie* (Title) OR nursing education OR nursing students (Abstract) AND art OR arts OR painting OR sculpture OR drawing OR music OR dance OR drama OR poetry OR photo* OR movie* (Abstract)        | Article (Document Types) and English (Languages) Timespan: 1999-01-01 to 2023-12-31                                                                                                                                                                                      | 1,791   |
